# Supplementary material
Source: publisher figshare collection journal article supplement (https://gsajournals.figshare.com/articles/dataset/_/6275978)
Supplement: Supplementary file 1 [file 1]

## Sheet: Sheet1
	Table S1 Transcription errors and bases sequenced within protein coding regions
	MG1655 Strain	A→C	A→G	A→T	C→A	C→G	C→T	G→A	G→C	G→T	T→A	T→C	T→G	Dels†	Ins‡	A Coverage	C Coverage	G Coverage	T Coverage	Total Coverage
	WT 1	27	21	23	29	14	76	18	25	49	16	30	19	25	6	1914230	2075694	2100948	1727031	7817903
	WT 2	11	17	19	30	8	26	18	11	24	21	15	5	17	5	870875	912819	971201	813674	3568569
	ΔgreA 1	24	29	9	31	14	69	114	23	38	12	45	16	123	8	1767903	1900004	1965251	1606807	7239965
	ΔgreA 2	39	45	47	83	28	75	234	35	100	99	57	33	21	21	2908690	3150132	3241020	2751183	12051025
	ΔgreB 1	43	31	26	38	21	73	31	16	52	36	30	26	18	7	2102243	2296956	2358159	1901919	8659277
	ΔgreB 2	31	22	16	38	13	50	47	25	55	42	33	30	28	0	1754532	1888959	1931289	1635838	7210618
	ΔdksA 1	36	12	19	27	14	48	27	16	24	16	24	19	14	7	1574736	1708601	1738151	1418559	6440047
	ΔdksA 2	22	13	14	30	10	30	34	8	27	26	19	9	20	6	1010228	1075324	1122627	954728	4162907
	ΔgreAB 1	20	18	13	17	12	53	175	13	21	13	22	8	14	3	1458400	1602389	1632156	1318018	6010963
	ΔgreAB 2	16	20	15	25	5	33	103	16	31	41	16	8	10	4	834145	900528	946352	792676	3473701
	ΔgreAdksA 1	16	20	10	18	12	56	176	16	35	12	28	21	13	21	1763717	1941089	1946672	1598587	7250065
	ΔgreAdksA 2	26	21	30	39	13	61	140	32	47	43	47	19	16	7	1626348	1731425	1774090	1513964	6645827
	ΔgreBdksA 1	20	21	15	18	13	45	24	15	28	21	25	12	45	4	1576377	1758867	1781051	1441509	6557804
	ΔgreBdksA 2	27	38	35	51	12	52	57	24	50	53	29	13	15	5	1552564	1657415	1703767	1464331	6378077
	ΔgreABdksA 1	27	25	26	20	9	85	188	12	33	20	33	13	8	14	1914684	2157257	2263249	1748552	8083742
	ΔgreABdksA 2	13	17	24	31	6	46	114	10	19	23	17	10	214	11	904218	1029531	1050054	887327	3871130
	†Transcription deletions, ‡Transcription insertions
